# Supplementary material
Source: PubMed Central journal article supplement (PMC3880828)
Supplement: NIHMS532320-supplement-1_si_001.pdf [file NIHMS532320-supplement-1_si_001.pdf]

**A Preparation of (-)-Nutlin-3 Using Enantioselective Organocatalysis at Decagram Scale**Tyler A. Davis,<sup>a</sup> Anna E. Vilgelm,<sup>b,c</sup> Ann Richmond,<sup>b,c</sup> and Jeffrey N. Johnston<sup>a\*</sup>

<sup>a</sup>Department of Chemistry & Vanderbilt Institute of Chemical Biology, Vanderbilt University, Nashville, TN 37235-1822, USA, <sup>b</sup>Department of Veterans Affairs, Tennessee Valley Healthcare System, <sup>c</sup>Department of Cancer Biology, Vanderbilt School of Medicine, Nashville, TN 37232, USA

|                                                                                 | SI-I-X |
|---------------------------------------------------------------------------------|--------|
| Figure 1. <sup>1</sup> H NMR (400 MHz, CDCl <sub>3</sub> ) of <b>19</b> .....   | 2      |
| Figure 2. <sup>13</sup> C NMR (150 MHz, CDCl <sub>3</sub> ) of <b>19</b> .....  | 3      |
| Figure 5. <sup>1</sup> H NMR (500 MHz, CDCl <sub>3</sub> ) of <b>21</b> .....   | 4      |
| Figure 6. <sup>13</sup> C NMR (100 MHz, CDCl <sub>3</sub> ) of <b>21</b> .....  | 5      |
| Figure 7. <sup>1</sup> H NMR (400 MHz, CDCl <sub>3</sub> ) of <b>22</b> .....   | 6      |
| Figure 8. <sup>13</sup> C NMR (150 MHz, CDCl <sub>3</sub> ) of <b>22</b> .....  | 7      |
| Figure 3. <sup>1</sup> H NMR (400 MHz, CDCl <sub>3</sub> ) of <b>23</b> .....   | 8      |
| Figure 4. <sup>13</sup> C NMR (100 MHz, CDCl <sub>3</sub> ) of <b>23</b> .....  | 9      |
| Figure 9. <sup>1</sup> H NMR (400 MHz, CDCl <sub>3</sub> ) of <b>S1</b> .....   | 10     |
| Figure 10. <sup>13</sup> C NMR (100 MHz, CDCl <sub>3</sub> ) of <b>S1</b> ..... | 11     |
| Figure 11. <sup>1</sup> H NMR (400 MHz, CDCl <sub>3</sub> ) of <b>S2</b> .....  | 12     |
| Figure 12. <sup>13</sup> C NMR (100 MHz, CDCl <sub>3</sub> ) of <b>S2</b> ..... | 13     |
| Figure 13. Representative HPLC traces for <b>16</b> .....                       | 14     |

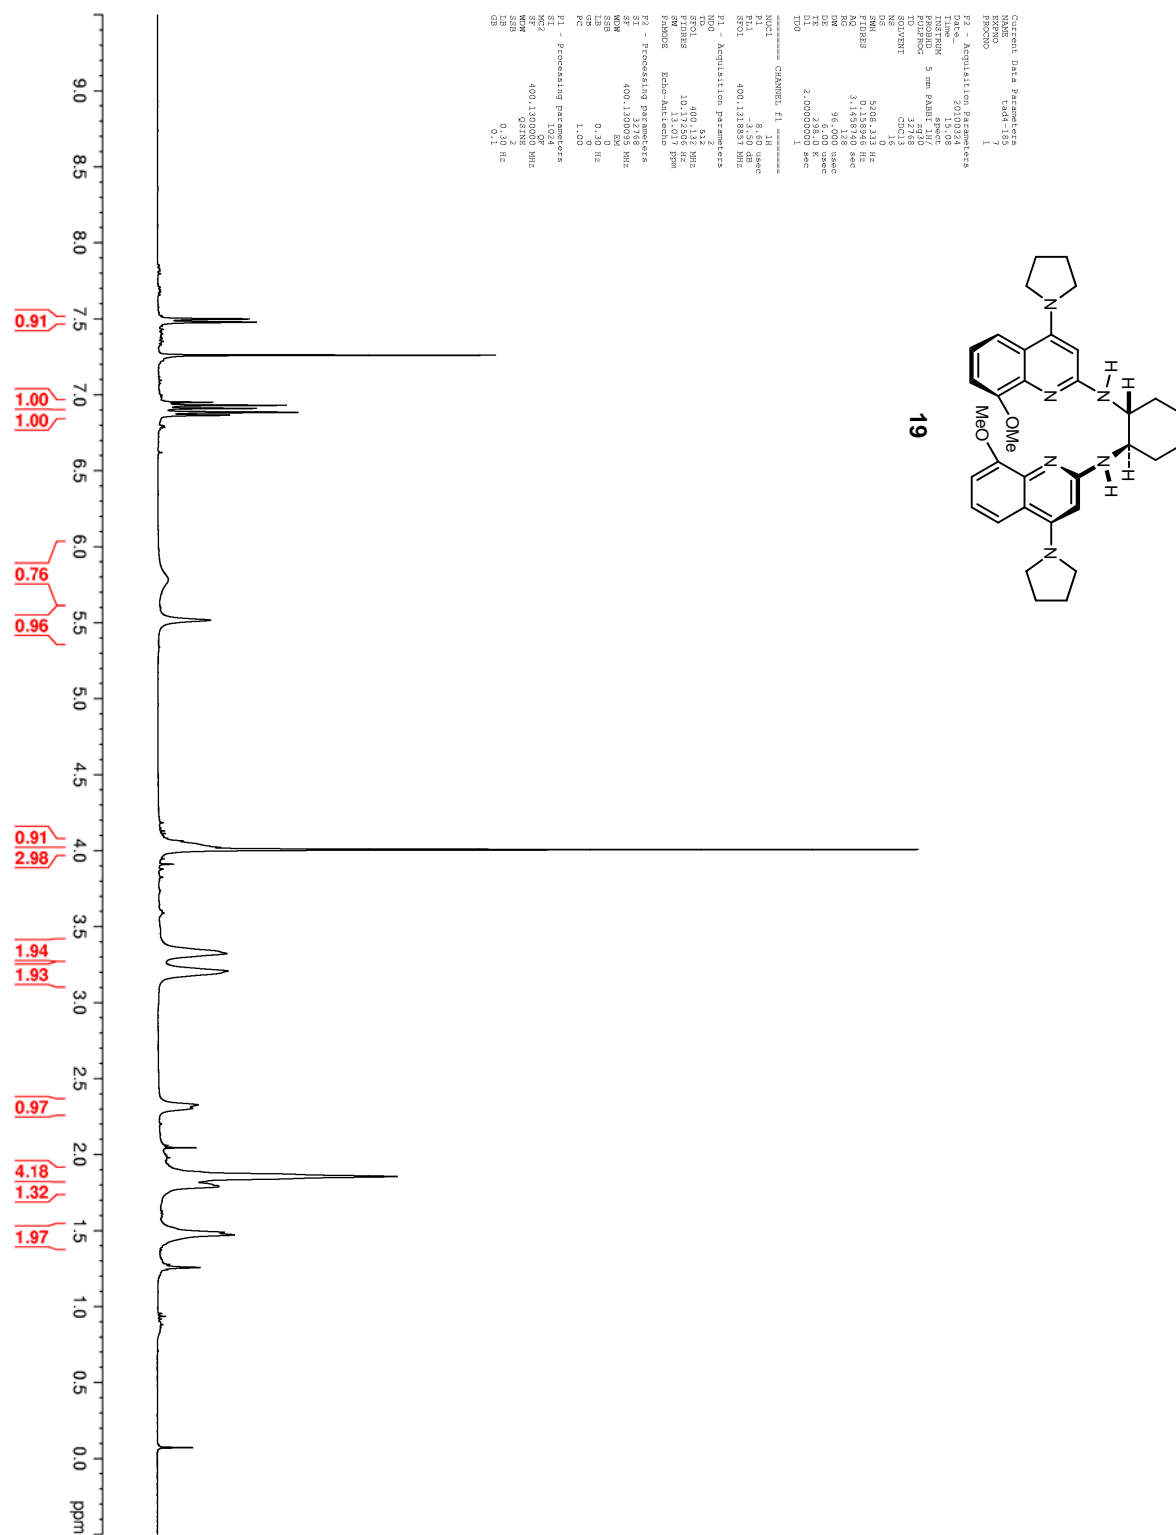

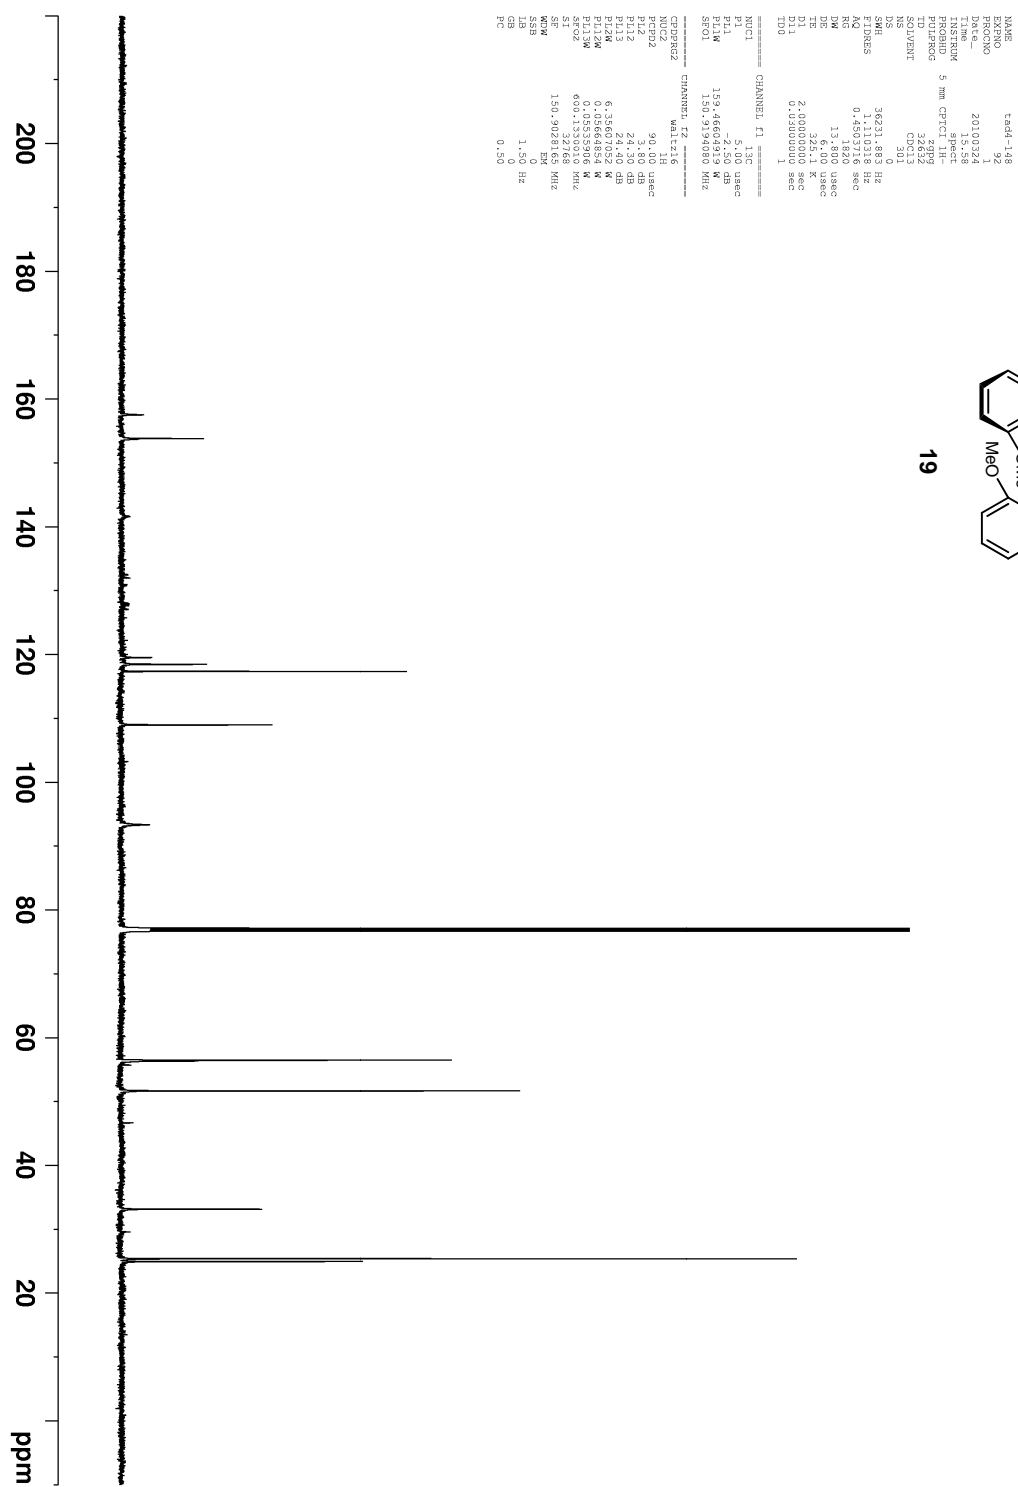

post soxhlet ext, prec'd material

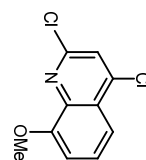

```

Current Data Parameters
NAME      Ladd-125
EXPNO     1
PROCNO    1
F2 - Acquisition Parameters
Date_     2010-11-15
Time      15:45
INSTRUM   spect
PROBHD    5 mm QNP 1H/13
PULPROG   zgpg30
TD         32768
SOLVENT   cdcl3
DS         1
SFO1      500.1360500 MHz
FIDRES    0.1198882 Hz
AQ         0.64571 sec
RG         645.1
DE         76.800 usec
TE         300.2 K
D1         2.0000000 sec
TDO       1
----- CHANNEL f1 -----
NUC1       1H
P1         11.31 usec
PL1        0.00 dB
SFO1      500.1360500 MHz
F2 - Processing parameters
SI         32768
WDW        EM
SSB         0
GB          0.30 Hz
PC         1.00
  
```

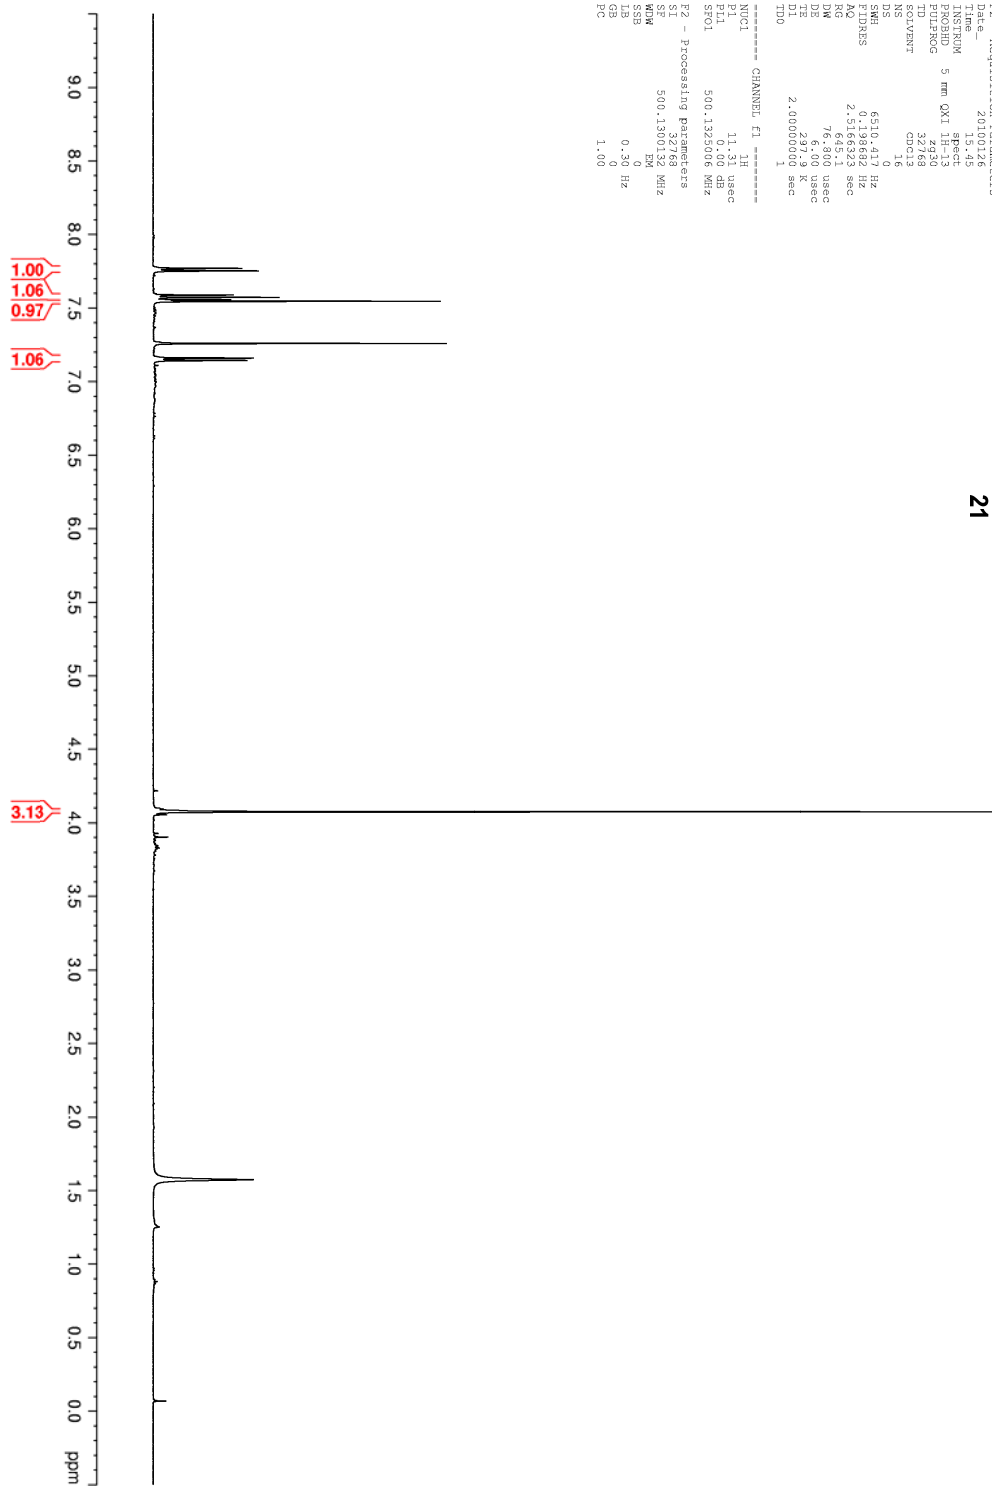

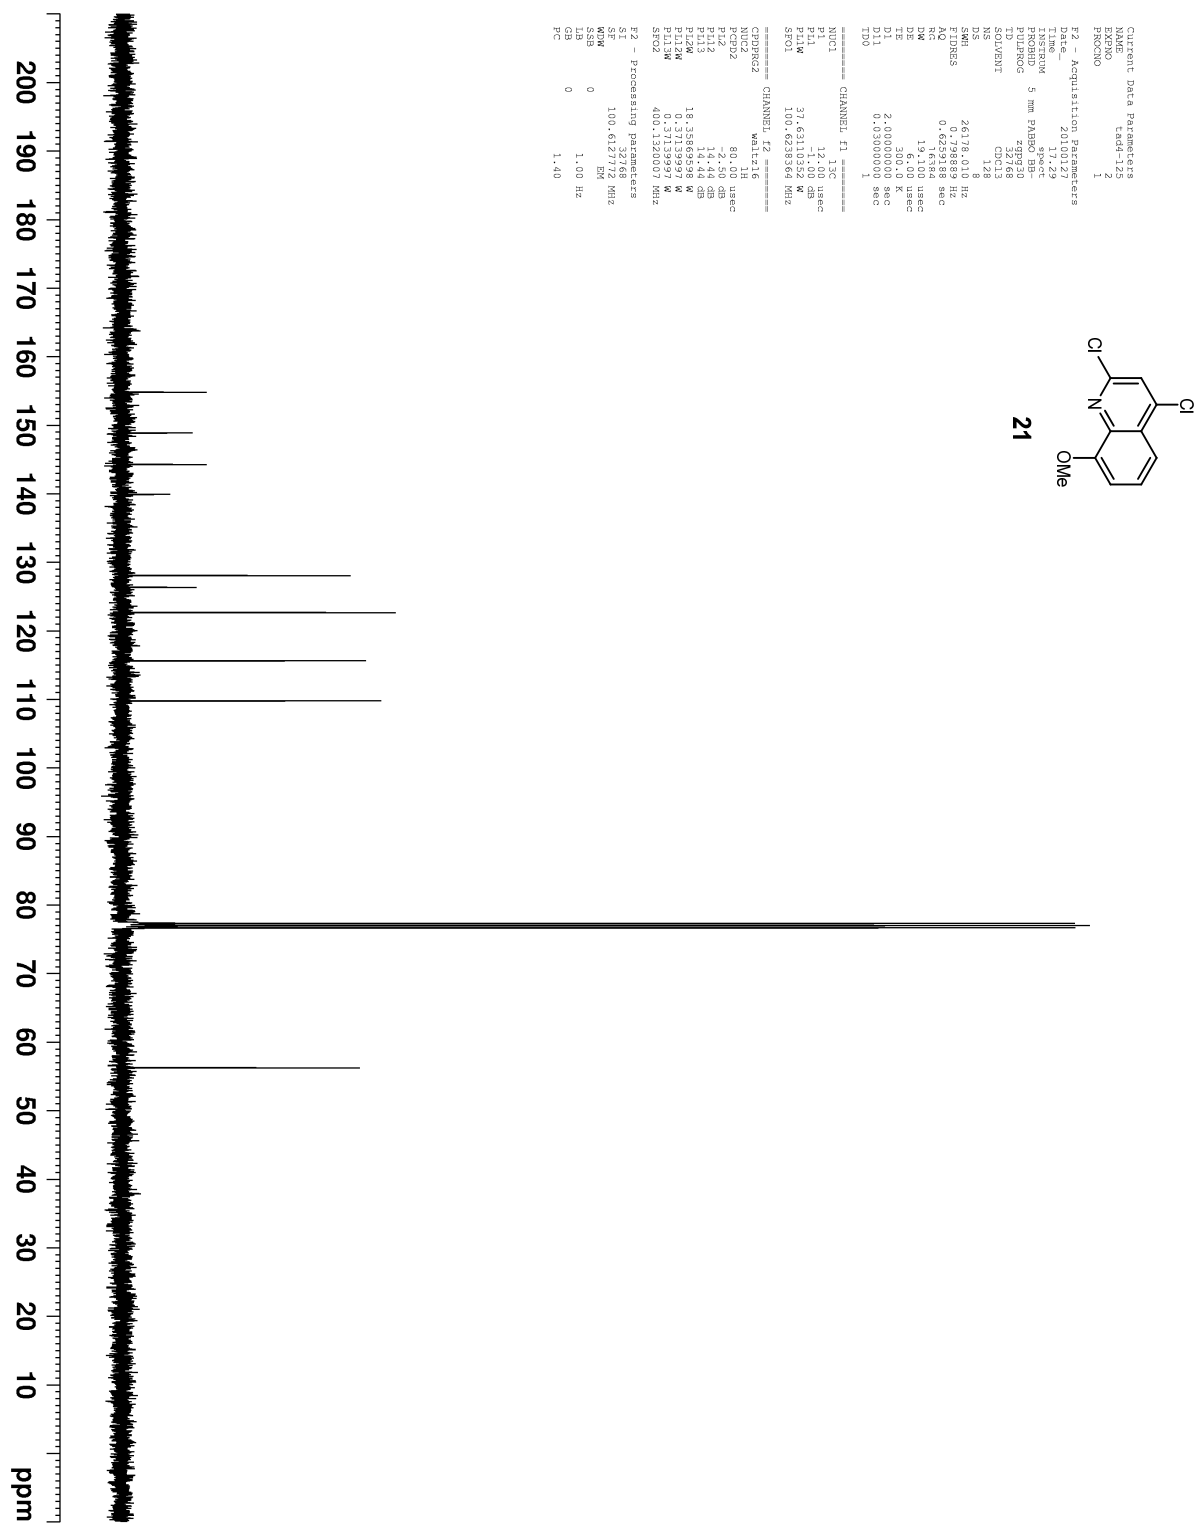

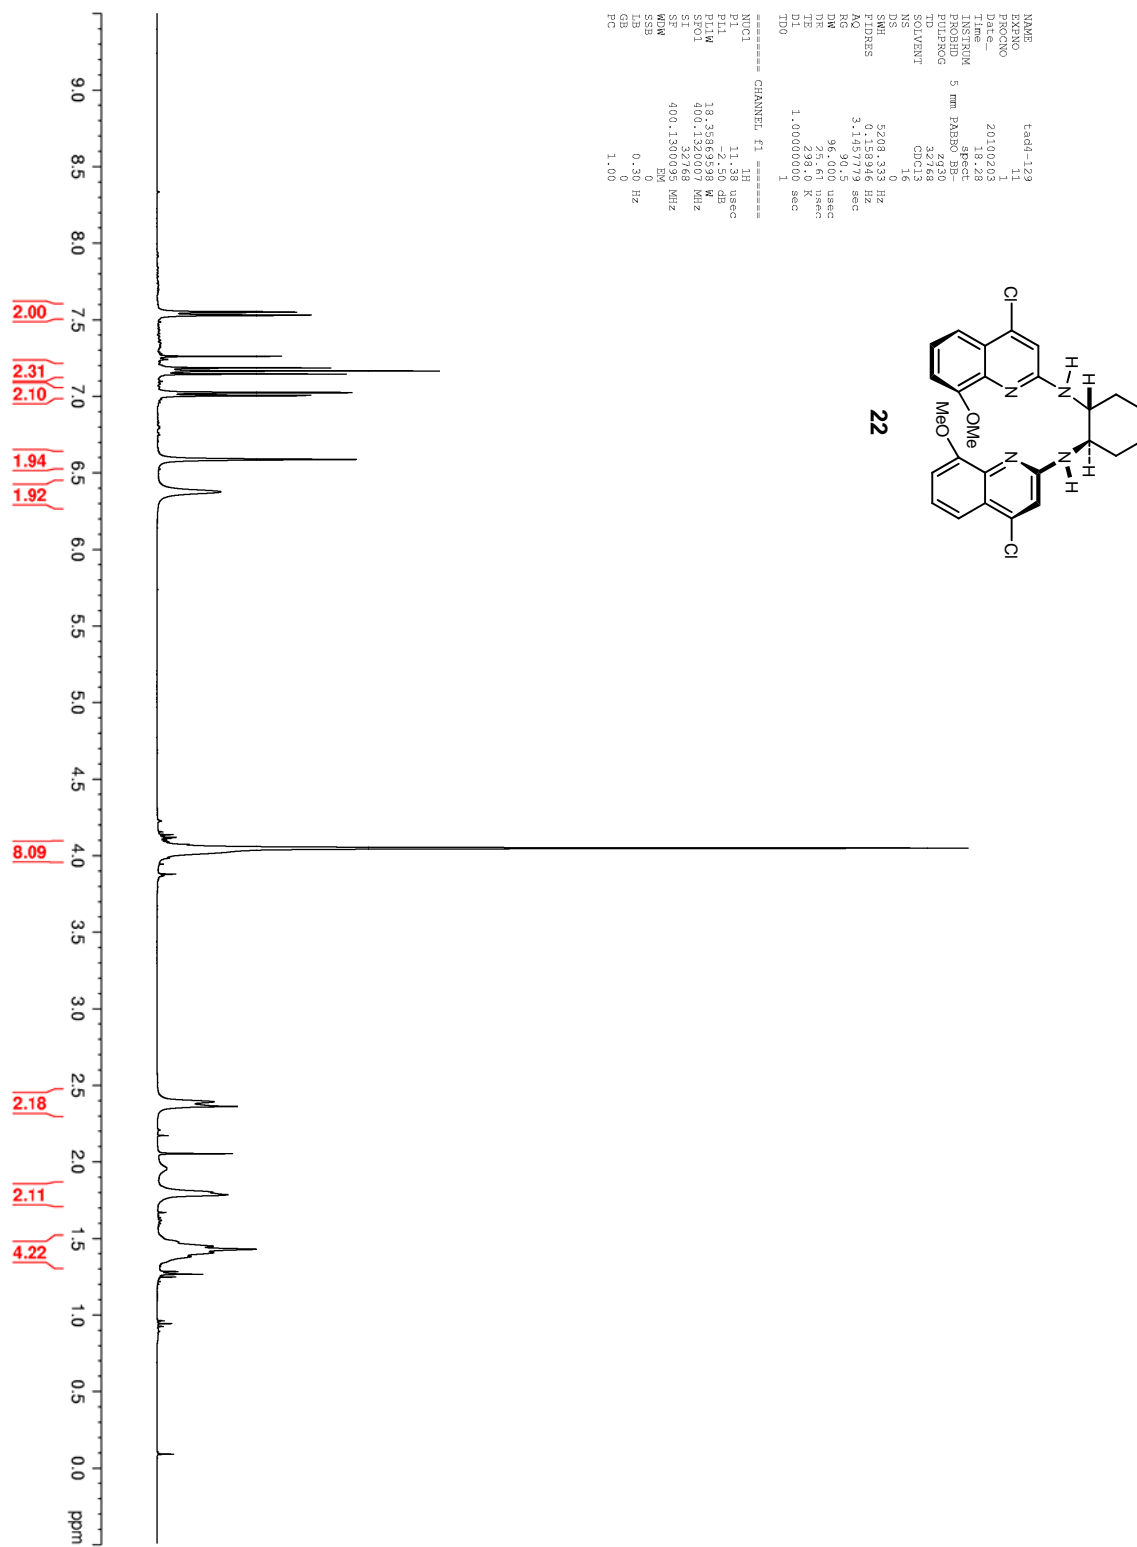

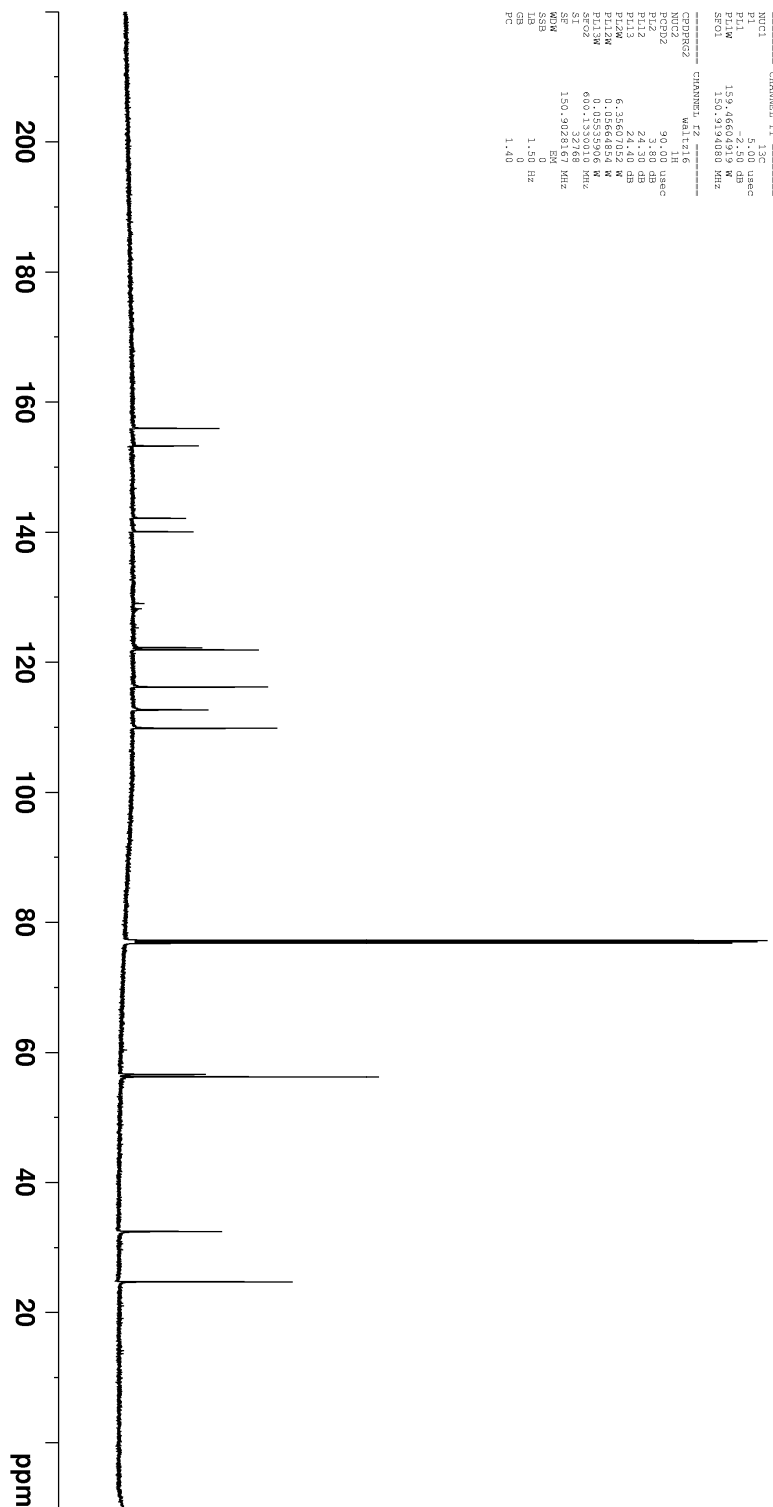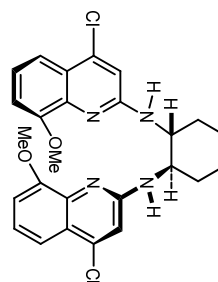

```

NAME      EHM-129
PROBHD    Z
DATE      20100203
TIME      13.20
PROCNO    5
PROBHD    5 mm CPYCL-1B-
PULPROG   zgpg
SOVLENT   CDCl3
NS        74
SFO1      36231.883 Hz
P1PERS    1.105109 Hz
RG         0.482483 sec
DM         13.800 usec
DE         4.00 usec
D1         2.30000000 sec
D11        0.33000000 sec
D12        1
  
```

```

===== CHANNEL F1 =====
NUC1      13
P1        5.00 usec
PL14     159.466425 dB
SFO1      150.999400 MHz

===== CHANNEL F2 =====
NAME      WALTZ16
PROBHD    Z
DATE      20100203
TIME      13.20
PROCNO    5
PROBHD    5 mm CPYCL-1B-
PULPROG   zgpg
SOVLENT   CDCl3
NS        74
SFO1      36231.883 Hz
P1PERS    1.105109 Hz
RG         0.482483 sec
DM         13.800 usec
DE         4.00 usec
D1         2.30000000 sec
D11        0.33000000 sec
D12        1
  
```

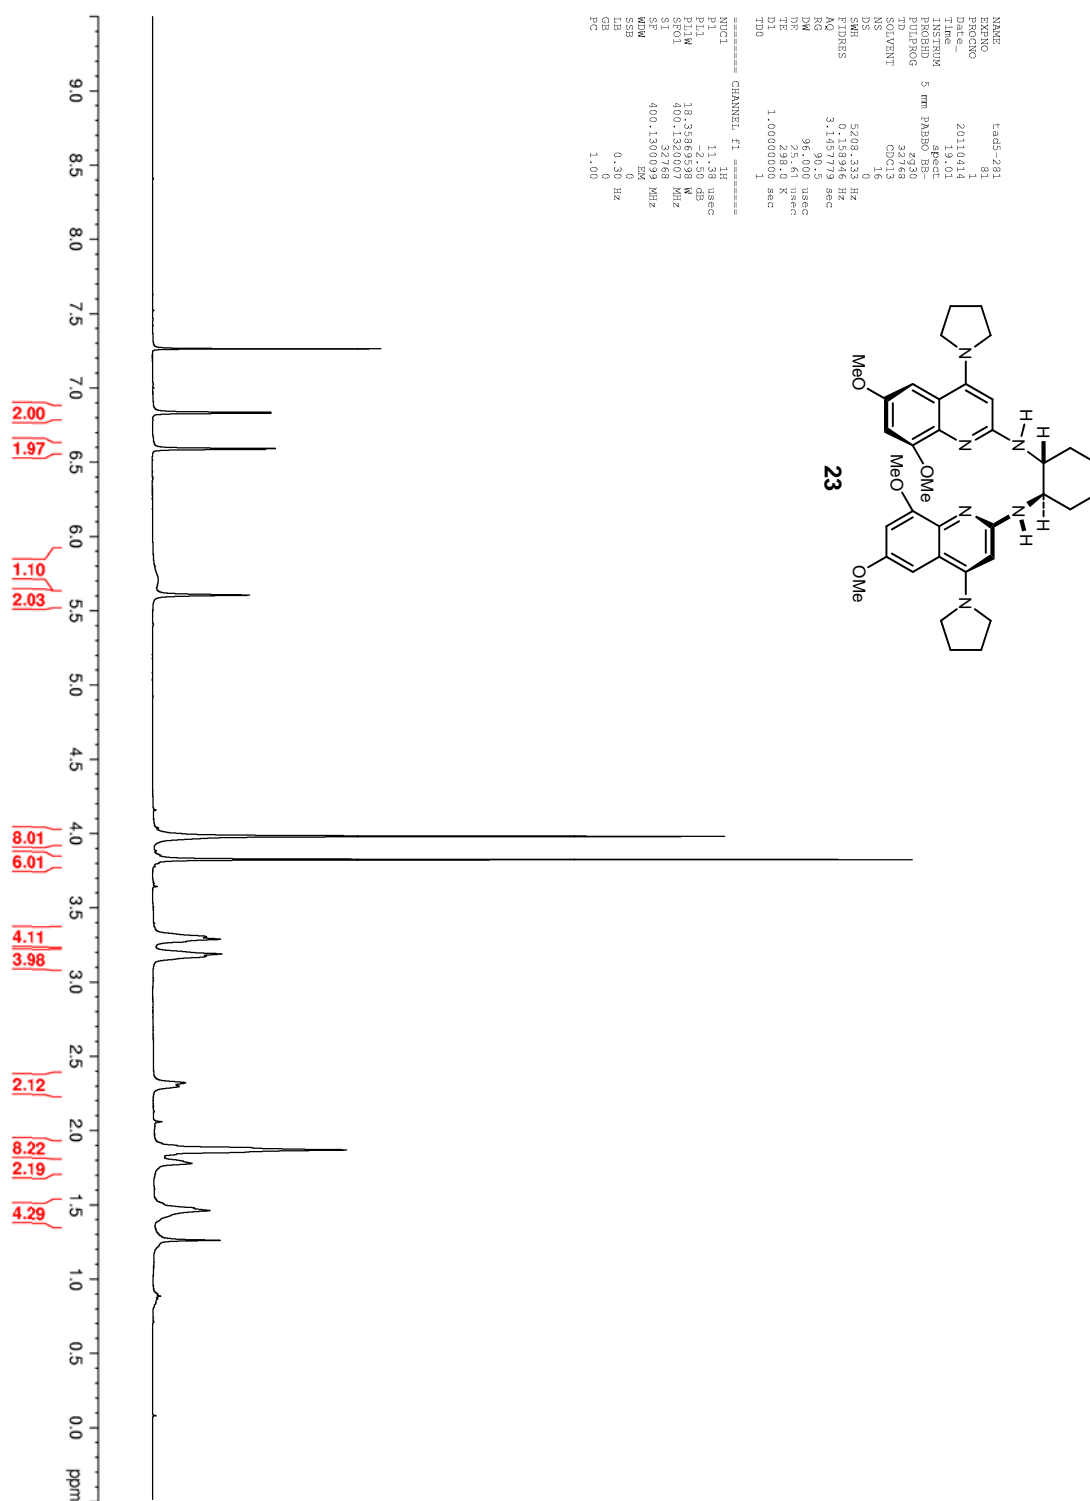



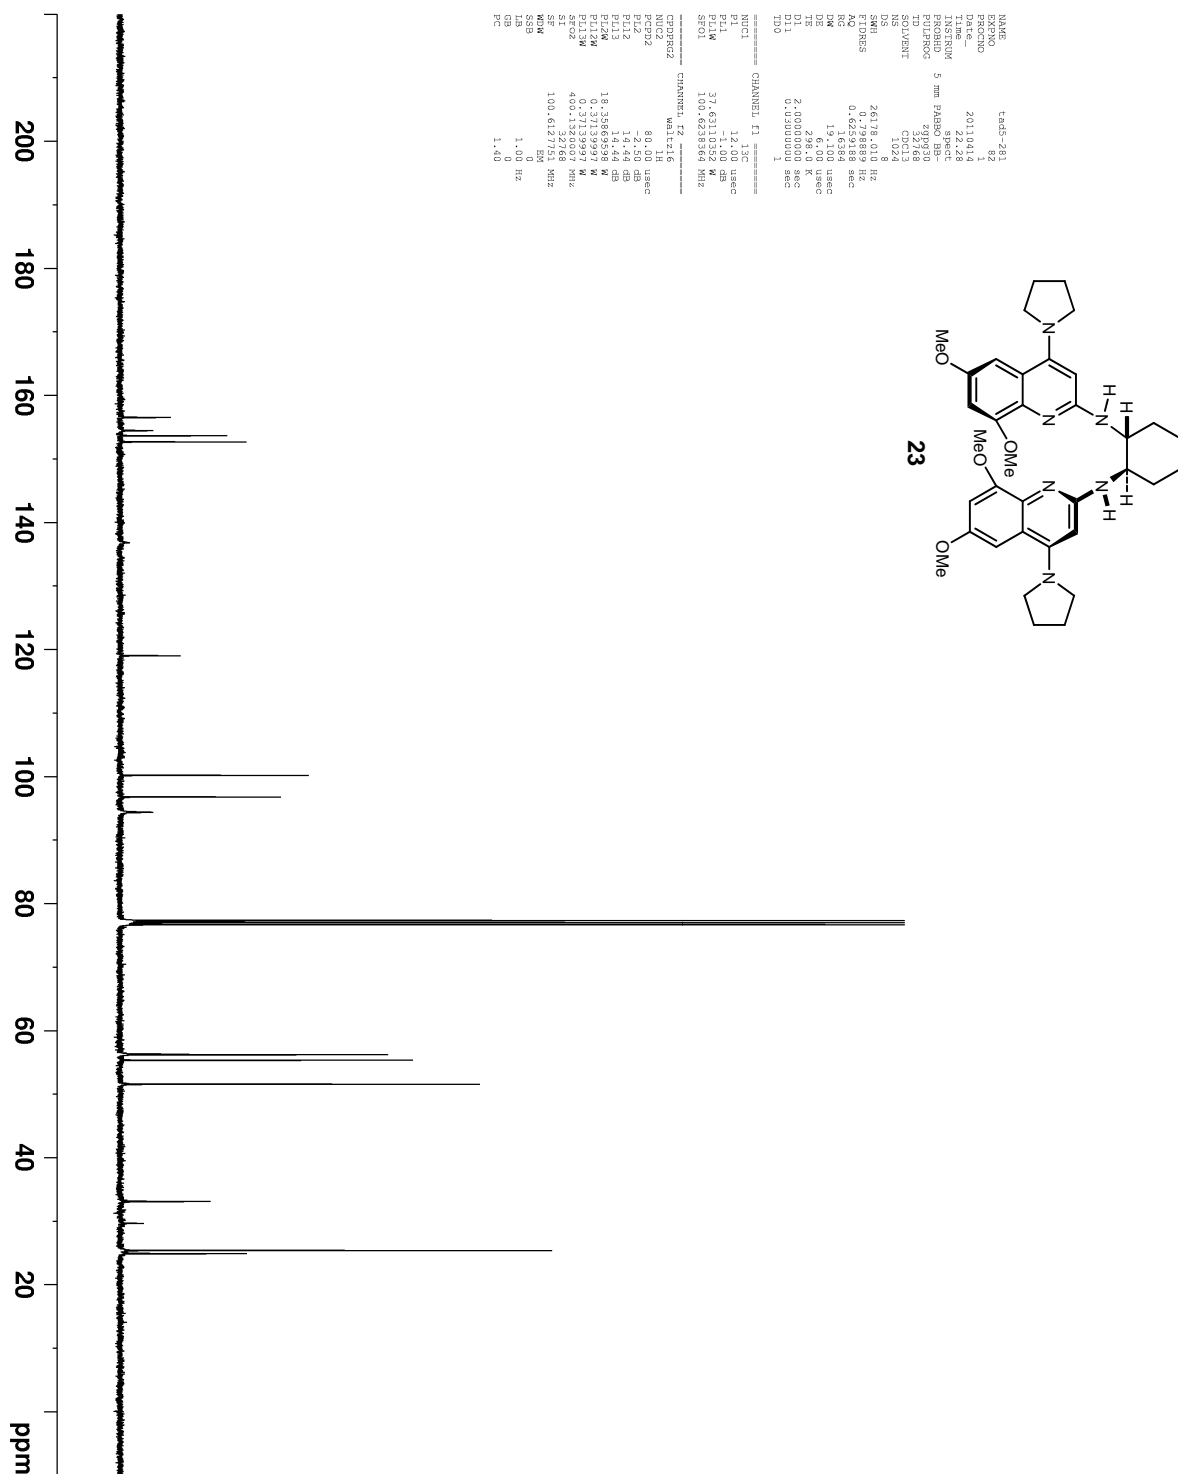

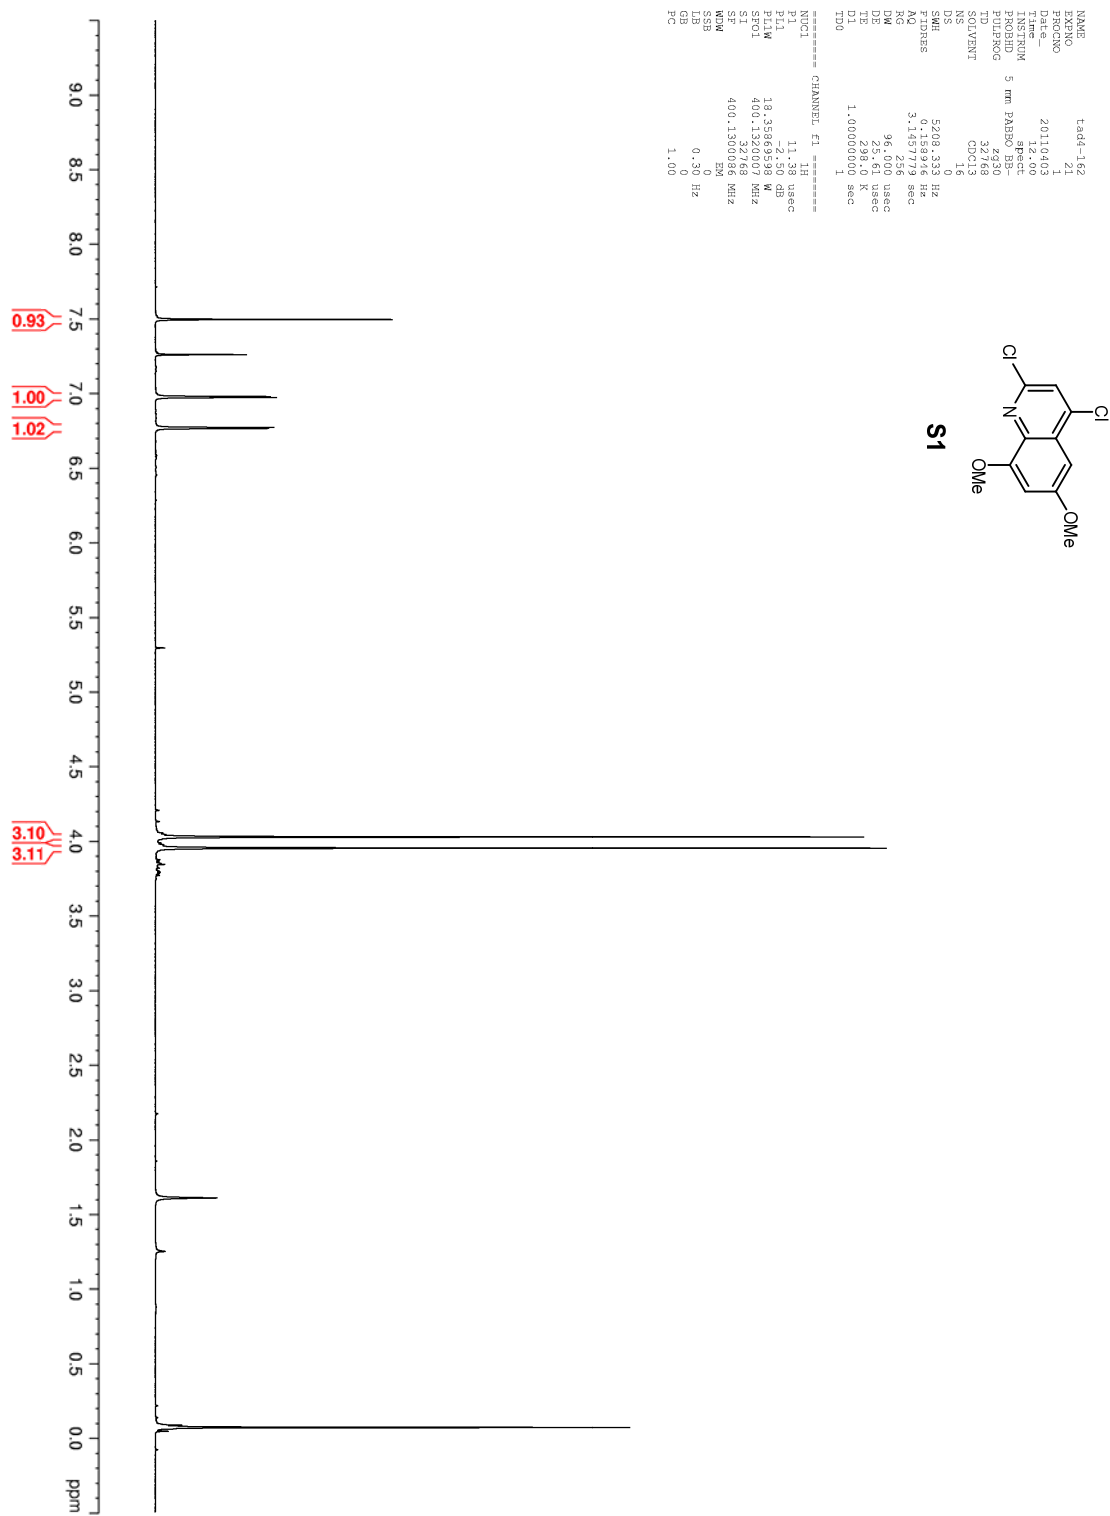

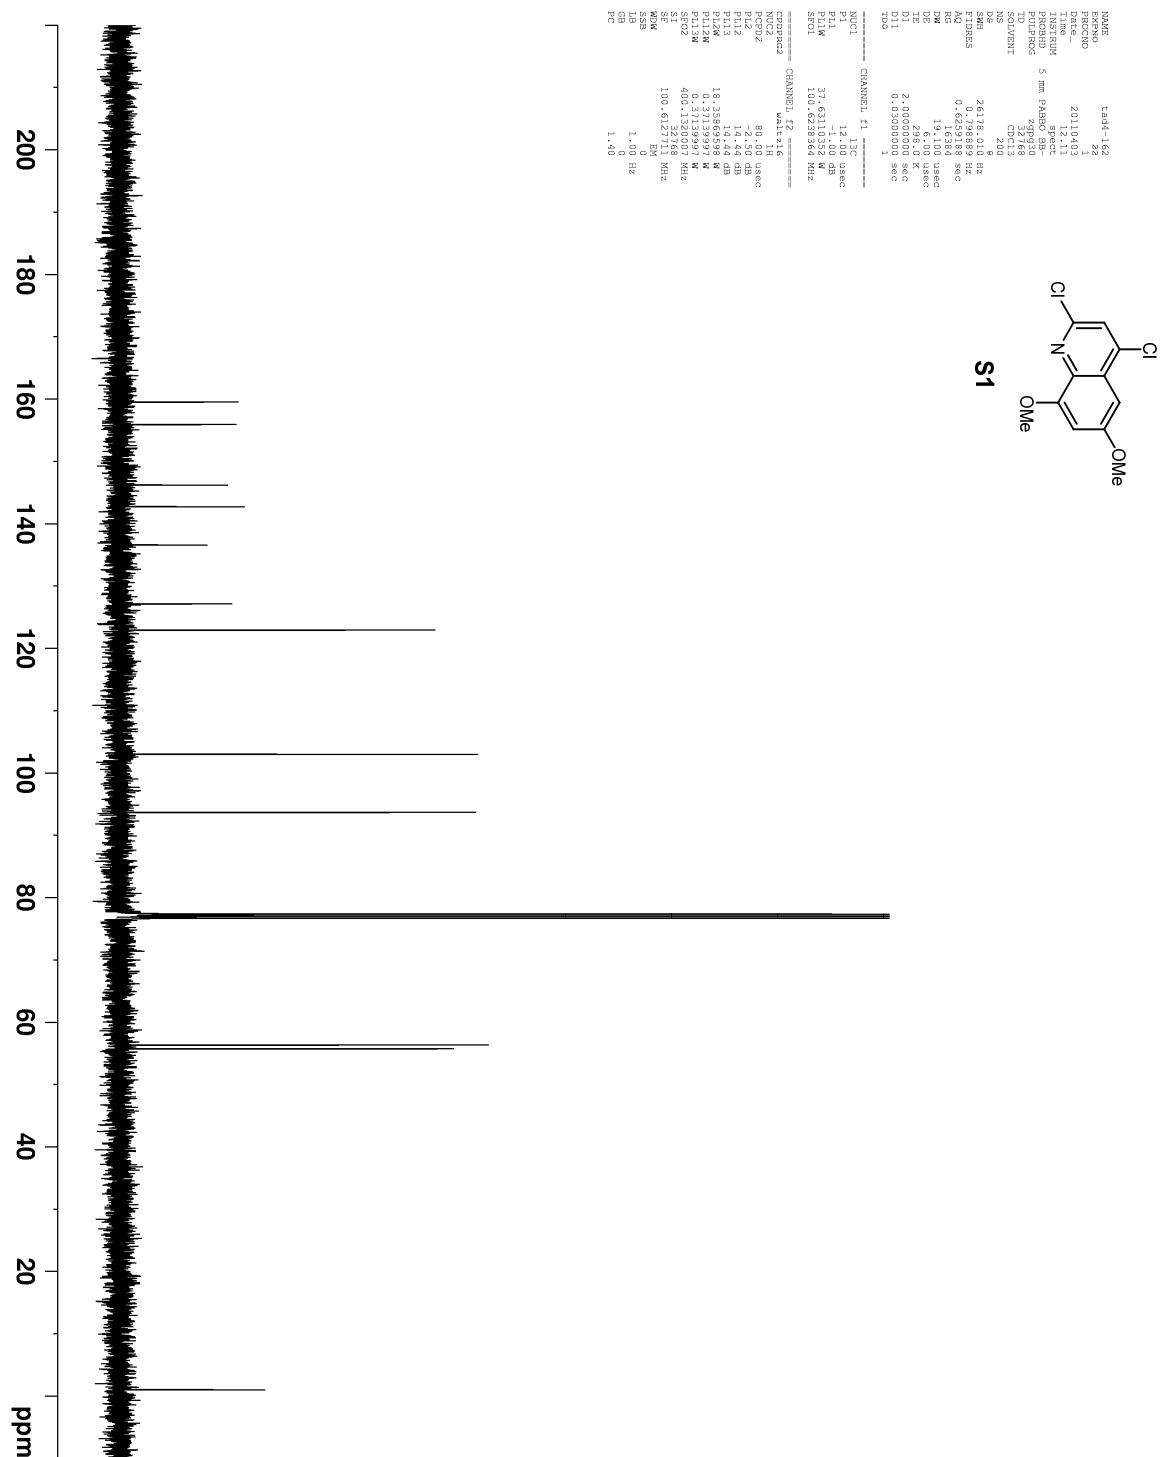

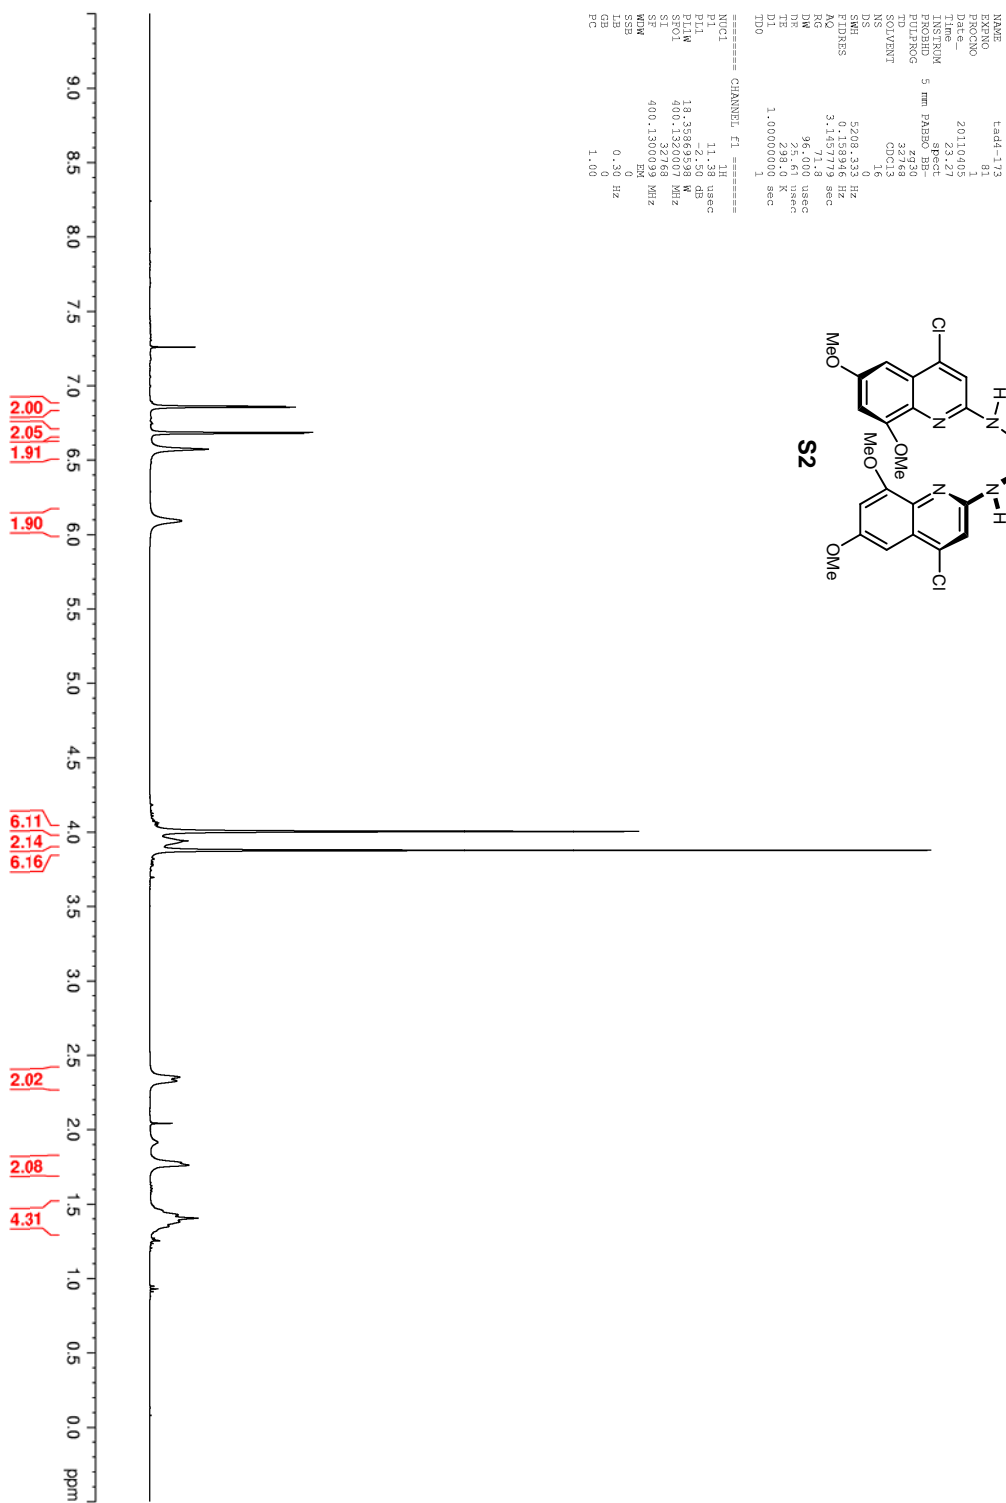

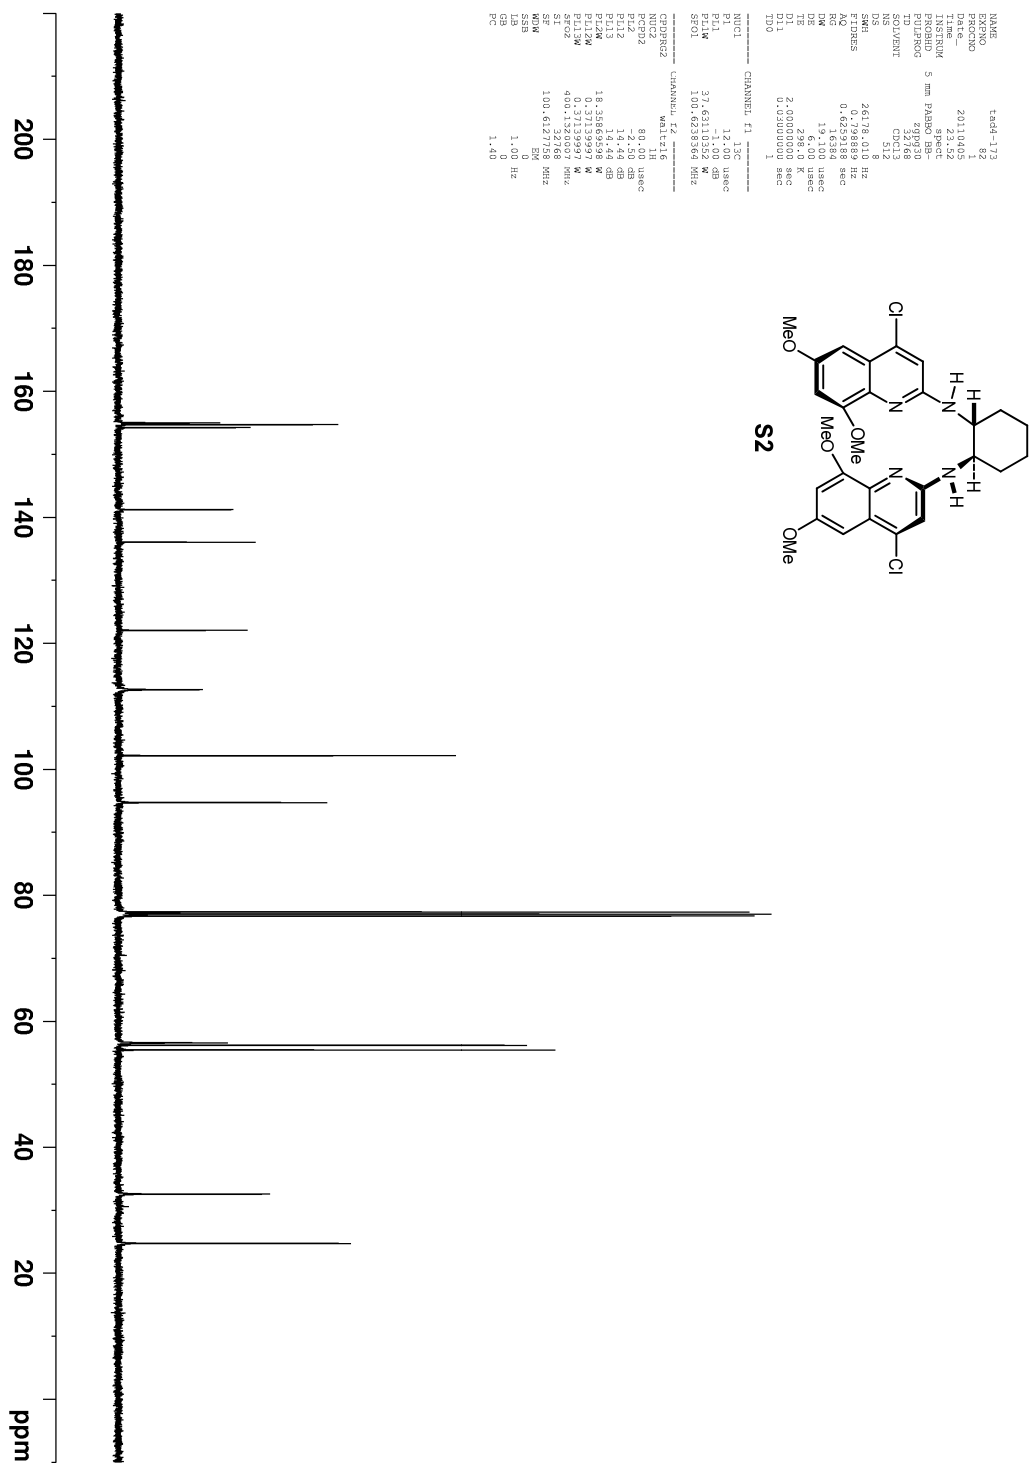

Figure 13. Representative HPLC traces for **16**

Racemate:

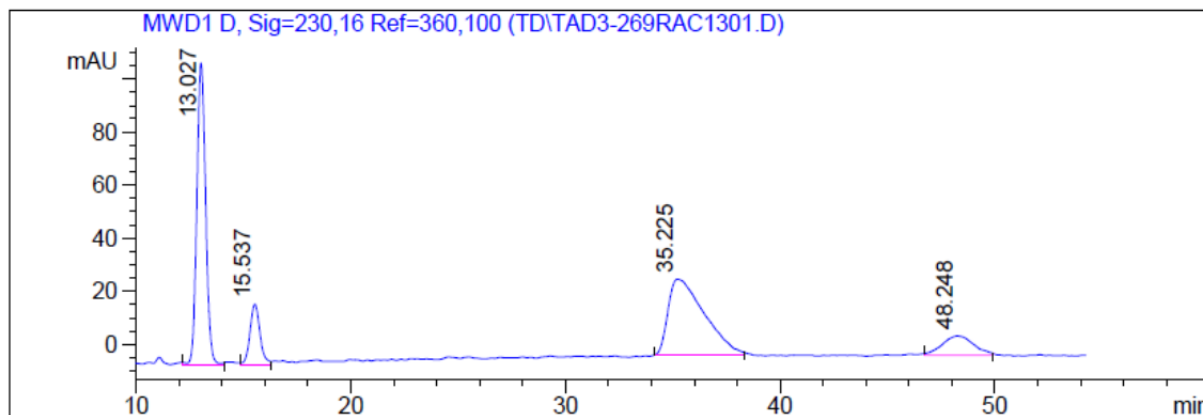

Signal 1: MWD1 D, Sig=230,16 Ref=360,100

| Peak # | RT [min] | Width [min] | Area     | Area % |
|--------|----------|-------------|----------|--------|
| 1      | 13.027   | 0.474       | 3225.581 | 40.13  |
| 2      | 15.537   | 0.535       | 725.792  | 9.03   |
| 3      | 35.225   | 1.952       | 3345.620 | 41.63  |
| 4      | 48.248   | 1.698       | 739.845  | 9.21   |

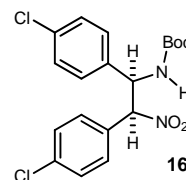

Enantioselective:

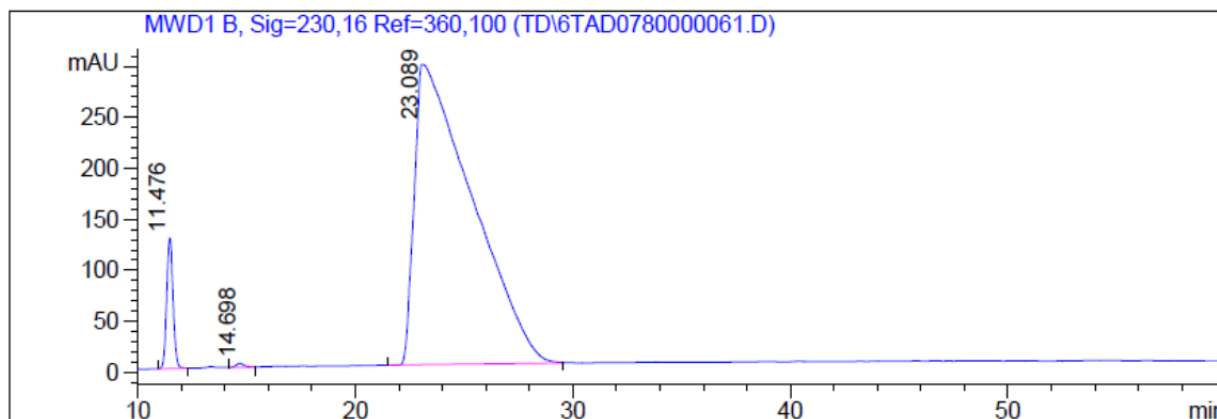

Signal 1: MWD1 B, Sig=230,16 Ref=360,100

| Peak # | RT [min] | Width [min] | Area      | Area % |
|--------|----------|-------------|-----------|--------|
| 1      | 11.476   | 0.314       | 2590.033  | 4.55   |
| 2      | 14.698   | 0.406       | 103.082   | 0.18   |
| 3      | 23.089   | 2.342       | 54242.629 | 95.27  |

Recrystallized: Batch 1

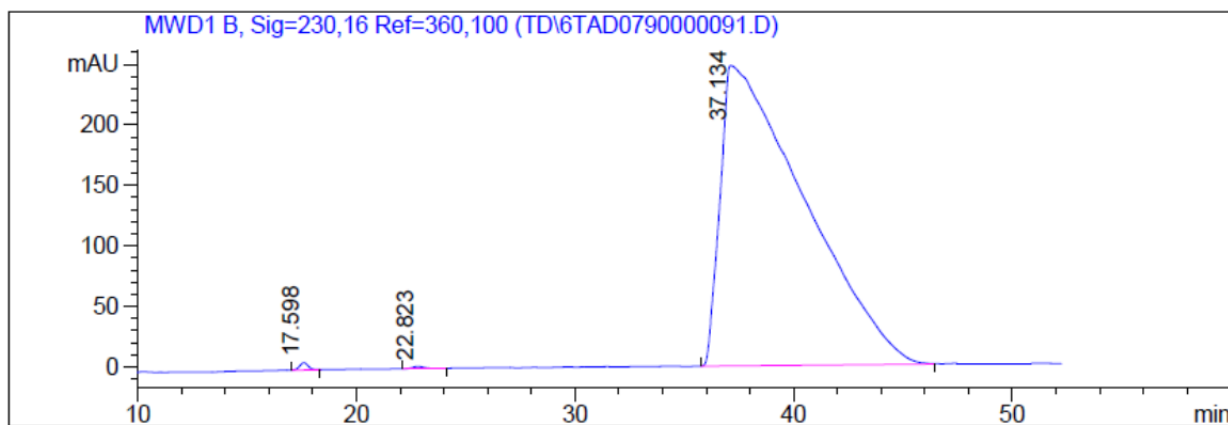

Signal 1: MWD1 B, Sig=230,16 Ref=360,100

| Peak # | RT [min] | Width [min] | Area      | Area % |
|--------|----------|-------------|-----------|--------|
| 1      | 17.598   | 0.431       | 170.323   | 0.26   |
| 2      | 22.823   | 0.518       | 60.978    | 0.09   |
| 3      | 37.134   | 3.289       | 66417.211 | 99.65  |

Recrystallized: Batch 2

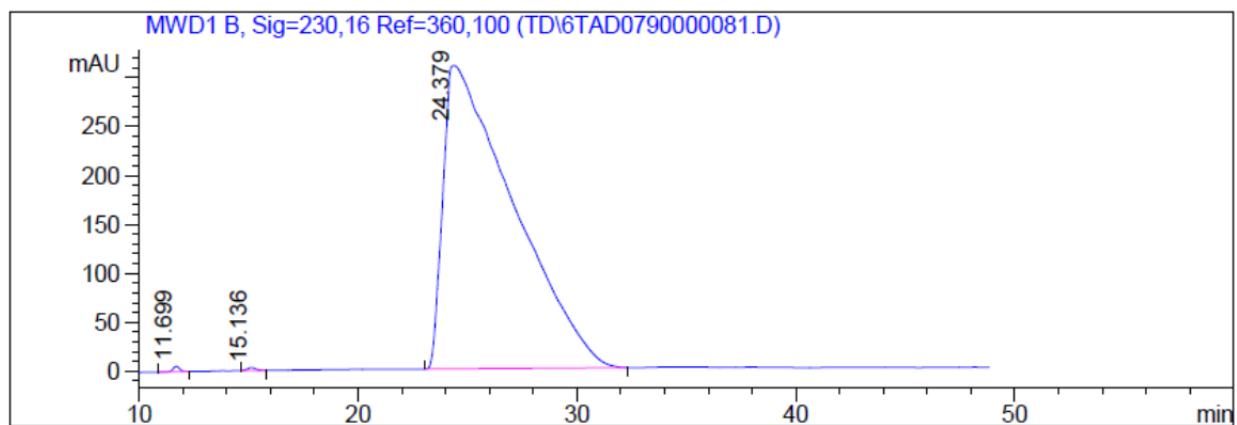

Signal 1: MWD1 B, Sig=230,16 Ref=360,100

| Peak # | RT [min] | Width [min] | Area      | Area % |
|--------|----------|-------------|-----------|--------|
| 1      | 11.699   | 0.323       | 115.710   | 0.17   |
| 2      | 15.136   | 0.417       | 88.944    | 0.13   |
| 3      | 24.379   | 2.782       | 69196.984 | 99.71  |
